# Supplementary material for: Accumulation of As, Ag, Cd, Cu, Pb, and Zn by Native Plants Growing in Soils Contaminated by Mining Environmental Liabilities in the Peruvian Andes
Source: PubMed Central journal article supplement (PMC7922771; doi:10.3390/plants10020241), 2021-01-27
Supplement: plants-10-00241-s001.pdf [file plants-10-00241-s001.pdf]

## Supplementary Material

**Table S1.** Chemical elements abundances in the Earth's Crust and geochemical baseline values near at the sampling sites.

|                                                                                                 | Pb    | Zn    | Cu   | As   | Ag   | Cd   |
|-------------------------------------------------------------------------------------------------|-------|-------|------|------|------|------|
| Abundances of Chemical Elements in the Earth's Crust [31]                                       | 16    | 83    | 47   | 1.7  | 0.07 | 0.13 |
| Geochemical baseline values in a natural region (La Zanja) at 30km from the sampling place [22] | 44.87 | 47.42 | 22.2 | 27.5 | -    | 4.36 |

**Table S2.** Trace elements concentrations (mg kg<sup>-1</sup>) (mean ± SD) of As, As, Cd, Cu, Pb and Zn in different organs of the native plants from two study areas (S1 and S2) in Hualgayoc district, Cajamarca region, Peru.

| N° | Family          | Native species                  | Sites | Biological replicates | Organs | Ag          | As           | Cd          | Cu          | Pb           | Zn            |
|----|-----------------|---------------------------------|-------|-----------------------|--------|-------------|--------------|-------------|-------------|--------------|---------------|
| 1  |                 | <i>Achyrocline alata</i>        | S1    | 2                     | L      | 0.57 ± 0.02 | 3.82 ± 0.18  | 3.04 ± 0.35 | 15.6 ± 1.41 | 24.4 ± 2.69  | 266.9 ± 28.0  |
|    |                 |                                 |       |                       | S      | 0.15 ± 0.02 | 1.34 ± 0.05  | 3.58 ± 0.11 | 12.5 ± 0.25 | 38.2 ± 3.63  | 298.3 ± 26.3  |
|    |                 |                                 |       |                       | R      | 0.73 ± 0.09 | 1.75 ± 0.66  | 2.12 ± 0.50 | 12.5 ± 1.06 | 82.7 ± 6.11  | 76.6 ± 7.69   |
|    |                 |                                 | S2    | 1                     | L      | 0.06 ± 0.01 | 0.68 ± 0.03  | 2.03 ± 0.14 | 9.52 ± 0.74 | 8.65 ± 0.73  | 197.6 ± 8.45  |
|    |                 |                                 |       |                       | S      | 0.03 ± 0.01 | 0.20 ± 0.01  | 3.28 ± 0.12 | 11.4 ± 0.59 | 28.9 ± 3.67  | 181.5 ± 8.22  |
|    |                 |                                 |       |                       | R      | 0.08 ± 0.01 | 0.25 ± 0.01  | 2.59 ± 0.28 | 6.81 ± 0.15 | 64.1 ± 3.48  | 63.8 ± 2.57   |
| 2  | Asteraceae      | <i>Ageratina fastigiata</i>     | S1    | 3                     | L      | 0.50 ± 0.02 | 1.58 ± 0.12  | 1.40 ± 0.09 | 9.01 ± 1.35 | 13.8 ± 1.53  | 110.9 ± 27.6  |
|    |                 |                                 |       |                       | S      | 0.34 ± 0.04 | 1.85 ± 0.11  | 1.70 ± 0.16 | 7.12 ± 0.67 | 30.7 ± 4.09  | 71.6 ± 7.40   |
|    |                 |                                 |       |                       | R      | 3.09 ± 0.37 | 5.02 ± 0.72  | 1.26 ± 0.17 | 15.1 ± 1.63 | 139.1 ± 19.7 | 61.2 ± 5.47   |
| 3  |                 | <i>Ageratina glechonophylla</i> | S1    | 1                     | L      | 0.75 ± 0.04 | 6.44 ± 0.44  | 0.88 ± 0.01 | 29.5 ± 0.74 | 52.0 ± 3.93  | 80.4 ± 1.16   |
|    |                 |                                 |       |                       | S      | 0.12 ± 0.01 | 1.44 ± 0.14  | 1.81 ± 0.23 | 12.0 ± 0.24 | 25.1 ± 5.92  | 54.5 ± 1.57   |
|    |                 |                                 |       |                       | R      | 4.82 ± 0.21 | 9.25 ± 0.91  | 1.29 ± 0.13 | 40.3 ± 2.36 | 203.8 ± 13.3 | 177.4 ± 5.80  |
| 4  |                 | <i>Baccharis alnifolia</i>      | S1    | 1                     | L      | 0.11 ± 0.01 | 0.38 ± 0.04  | 1.70 ± 0.12 | 7.12 ± 0.30 | 6.01 ± 0.82  | 171.6 ± 8.50  |
|    |                 |                                 |       |                       | S      | 0.06 ± 0.01 | 0.27 ± 0.01  | 3.45 ± 0.12 | 6.56 ± 0.60 | 66.4 ± 8.14  | 240.4 ± 29.0  |
|    |                 |                                 |       |                       | R      | 2.35 ± 0.17 | 0.90 ± 0.13  | 1.31 ± 0.09 | 12.3 ± 0.86 | 172.4 ± 22.3 | 51.3 ± 4.93   |
| 5  | Bromeliaceae    | <i>Puya sp</i>                  | S1    | 1                     | L      | 0.48 ± 0.01 | 5.12 ± 0.91  | 0.22 ± 0.01 | 13.3 ± 0.82 | 28.5 ± 5.28  | 145.0 ± 2.57  |
|    |                 |                                 |       |                       | R      | 1.00 ± 0.08 | 26.84 ± 2.48 | 0.13 ± 0.02 | 22.6 ± 0.41 | 105.3 ± 11.8 | 23.38 ± 2.06  |
| 6  | Calceolariaceae | <i>Calceolaria tetragona</i>    | S2    | 2                     | L      | 0.11 ± 0.01 | 0.52 ± 0.07  | 1.04 ± 0.13 | 7.22 ± 0.33 | 7.36 ± 0.64  | 53.08 ± 3.29  |
|    |                 |                                 |       |                       | S      | 0.10 ± 0.01 | 0.32 ± 0.02  | 6.63 ± 0.31 | 18.4 ± 0.87 | 104.0 ± 10.4 | 235.96 ± 10.2 |
|    |                 |                                 |       |                       | R      | 0.13 ± 0.01 | 0.72 ± 0.04  | 3.44 ± 0.06 | 12.7 ± 0.43 | 95.6 ± 5.06  | 220.65 ± 11.0 |

| N° | Family          | Native species                           | Sites | Biological replicates | Organs | Ag           | As           | Cd          | Cu           | Pb              | Zn             |
|----|-----------------|------------------------------------------|-------|-----------------------|--------|--------------|--------------|-------------|--------------|-----------------|----------------|
| 7  | Caryophyllaceae | <i>Arenaria digyna</i>                   | S1    | 1                     | L      | 2.28 ± 0.10  | 3.93 ± 0.40  | 3.18 ± 0.20 | 54.3 ± 1.81  | 288.3 ± 32.6*   | 342.34 ± 25.6  |
|    |                 |                                          |       |                       | S      | 10.49 ± 0.10 | 43.27 ± 6.49 | 6.30 ± 0.10 | 82.8 ± 1.65  | 1178.4 ± 46.5*  | 458.15 ± 81.3* |
|    |                 |                                          |       |                       | R      | 10.69 ± 0.79 | 53.45 ± 3.49 | 7.71 ± 0.32 | 71.8 ± 3.31  | 1657.7 ± 187.2* | 413.38 ± 58.6* |
| 8  |                 | <i>Bejaria sp.</i>                       | S1    | 2                     | L      | 0.07 ± 0.01  | 0.62 ± 0.06  | 0.06 ± 0.01 | 4.37 ± 0.34  | 2.74 ± 0.47     | 17.63 ± 1.52   |
|    |                 |                                          |       |                       | S      | 0.03 ± 0.01  | 0.42 ± 0.06  | 0.35 ± 0.08 | 3.49 ± 0.55  | 9.42 ± 1.12     | 40.41 ± 10.8   |
|    |                 |                                          |       |                       | R      | 0.20 ± 0.05  | 1.10 ± 0.59  | 0.16 ± 0.03 | 3.70 ± 0.69  | 15.3 ± 6.62     | 25.02 ± 5.66   |
| 9  | Ericaceae       | <i>Gaultheria glomerata</i>              | S2    | 1                     | L      | 0.08 ± 0.01  | 0.52 ± 0.05  | 0.45 ± 0.02 | 7.61 ± 0.39  | 8.89 ± 1.02     | 104.0 ± 4.64   |
|    |                 |                                          |       |                       | R      | 0.35 ± 0.02  | 1.80 ± 0.19  | 2.75 ± 0.14 | 19.52 ± 0.47 | 72.62 ± 6.99    | 243.5 ± 12.0   |
| 10 | Ericaceae       | <i>Pernettya prostrata</i>               | S1    | 1                     | L      | 0.02 ± 0.01  | 0.68 ± 0.09  | 0.16 ± 0.01 | 4.64 ± 0.87  | 3.21 ± 1.09     | 28.8 ± 3.99    |
|    |                 |                                          |       |                       | S      | 0.12 ± 0.02  | 2.56 ± 0.54  | 0.54 ± 0.04 | 10.29 ± 1.32 | 16.9 ± 2.75     | 85.3 ± 14.79   |
|    |                 |                                          |       |                       | R      | 0.81 ± 0.14  | 15.19 ± 2.87 | 0.53 ± 0.06 | 22.01 ± 1.61 | 129.8 ± 20.71   | 52.8 ± 7.43    |
|    |                 |                                          | S2    | 2                     | L      | 0.03 ± 0.01  | 0.85 ± 0.02  | 0.42 ± 0.01 | 5.14 ± 0.38  | 3.34 ± 0.45     | 29.6 ± 0.73    |
|    |                 |                                          |       |                       | S      | 0.04 ± 0.01  | 0.55 ± 0.03  | 1.18 ± 0.03 | 7.50 ± 0.09  | 11.30 ± 1.46    | 117.57 ± 3.66  |
|    |                 |                                          |       |                       | R      | 0.36 ± 0.03  | 2.33 ± 0.14  | 0.78 ± 0.02 | 15.19 ± 0.41 | 55.45 ± 4.23    | 157.34 ± 6.43  |
| 11 | Hypericaceae    | <i>Hypericum laricifolium</i>            | S1    | 4                     | L      | 0.20 ± 0.03  | 2.01 ± 0.37  | 1.88 ± 0.04 | 9.71 ± 0.74  | 15.84 ± 2.06    | 101.9 ± 2.68   |
|    |                 |                                          |       |                       | S      | 0.11 ± 0.01  | 1.15 ± 0.20  | 1.25 ± 0.22 | 9.12 ± 0.95  | 35.42 ± 5.71    | 84.51 ± 6.76   |
|    |                 |                                          |       |                       | R      | 1.79 ± 0.23  | 4.40 ± 0.86  | 1.16 ± 0.17 | 21.53 ± 3.37 | 132.8 ± 18.61   | 133.6 ± 11.97  |
|    |                 |                                          | S2    | 1                     | L      | 0.12 ± 0.01  | 0.27 ± 0.01  | 2.53 ± 0.08 | 10.71 ± 0.24 | 3.77 ± 0.27     | 99.6 ± 8.06    |
|    |                 |                                          |       |                       | S      | 0.09 ± 0.01  | 0.37 ± 0.03  | 2.32 ± 0.06 | 8.21 ± 0.23  | 40.0 ± 2.29     | 127.5 ± 9.19   |
|    |                 |                                          |       |                       | R      | 0.23 ± 0.01  | 1.58 ± 0.17  | 1.33 ± 0.10 | 6.07 ± 0.68  | 159.6 ± 21.5    | 167.5 ± 11.38  |
| 12 | Iridaceae       | <i>Orthrosanthus chimboracensis</i>      | S1    | 1                     | L      | 0.25 ± 0.04  | 0.78 ± 0.04  | 0.76 ± 0.04 | 4.90 ± 0.23  | 33.3 ± 2.75     | 100.7 ± 6.56   |
|    |                 |                                          |       |                       | R      | 3.41 ± 0.22  | 1.21 ± 0.08  | 0.27 ± 0.03 | 15.92 ± 0.27 | 68.6 ± 9.00     | 30.9 ± 3.49    |
| 13 | Melastomalaceae | <i>Brachyotum radula</i>                 | S1    | 2                     | L      | 1.11 ± 0.04  | 1.71 ± 0.19  | 0.05 ± 0.01 | 6.83 ± 0.32  | 8.73 ± 0.62     | 32.4 ± 1.71    |
|    |                 |                                          |       |                       | S      | 0.58 ± 0.09  | 1.44 ± 0.43  | 0.12 ± 0.02 | 7.57 ± 0.34  | 8.97 ± 1.77     | 28.9 ± 1.58    |
|    |                 |                                          |       |                       | R      | 1.74 ± 0.21  | 3.87 ± 0.49  | 0.14 ± 0.01 | 11.4 ± 1.03  | 53.5 ± 5.72     | 19.2 ± 1.56    |
|    |                 |                                          | S2    | 2                     | L      | 0.17 ± 0.01  | 0.41 ± 0.03  | 0.07 ± 0.01 | 7.96 ± 0.12  | 2.60 ± 0.28     | 29.2 ± 1.44    |
|    |                 |                                          |       |                       | S      | 0.17 ± 0.01  | 0.53 ± 0.04  | 0.30 ± 0.03 | 9.60 ± 0.29  | 9.73 ± 1.04     | 41.7 ± 2.84    |
|    |                 |                                          |       |                       | R      | 1.18 ± 0.07  | 0.63 ± 0.11  | 0.39 ± 0.07 | 13.12 ± 0.29 | 16.9 ± 2.21     | 31.0 ± 1.28    |
| 14 |                 | <i>Miconia vaccinioides</i> <sup>a</sup> | S2    | 1                     | L      | 0.15 ± 0.01  | 0.26 ± 0.03  | 1.52 ± 0.06 | 10.65 ± 0.32 | 25.5 ± 1.66     | 70.4 ± 3.93    |
|    |                 |                                          |       |                       | S      | 0.09 ± 0.01  | 0.20 ± 0.02  | 1.58 ± 0.05 | 6.41 ± 0.23  | 76.6 ± 4.05     | 76.6 ± 2.62    |
| 15 | Poaceae         | <i>Calamagrostis recta</i>               | S1    | 2                     | L      | 0.67 ± 0.08  | 3.99 ± 0.40  | 0.55 ± 0.02 | 10.9 ± 0.50  | 100.4 ± 12.0    | 81.7 ± 5.16    |
|    |                 |                                          |       |                       | R      | 13.3 ± 0.76  | 42.4 ± 3.67  | 1.83 ± 0.13 | 54.7 ± 1.60  | 826.5 ± 120.6*  | 309.5 ± 14.2   |
| 16 |                 | <i>Chusquea scandens</i>                 | S1    | 2                     | L      | 0.52 ± 0.07  | 4.76 ± 0.72  | 0.39 ± 0.01 | 11.5 ± 0.86  | 47.9 ± 5.44     | 152.5 ± 8.90   |
|    |                 |                                          |       |                       | S      | 0.43 ± 0.08  | 4.30 ± 0.87  | 0.19 ± 0.03 | 9.75 ± 2.13  | 36.1 ± 5.71     | 62.2 ± 8.81    |

| N° | Family           | Native species                               | Sites | Biological replicates | Organs | Ag          | As           | Cd           | Cu           | Pb           | Zn             |
|----|------------------|----------------------------------------------|-------|-----------------------|--------|-------------|--------------|--------------|--------------|--------------|----------------|
| 17 |                  | <i>Cortaderia bifida</i>                     | S1    | 5                     | R      | 1.97 ± 0.32 | 11.05 ± 2.24 | 0.25 ± 0.03  | 26.1 ± 2.35  | 77.6 ± 8.09  | 40.6 ± 0.98    |
|    |                  |                                              |       |                       | L      | 0.07 ± 0.01 | 0.49 ± 0.06  | 0.13 ± 0.10  | 4.15 ± 0.23  | 23.1 ± 2.73  | 25.5 ± 2.08    |
|    |                  |                                              |       |                       | S      | 0.08 ± 0.01 | 0.66 ± 0.04  | 0.17 ± 0.01  | 4.41 ± 0.41  | 22.3 ± 1.48  | 39.8 ± 8.27    |
|    |                  |                                              |       |                       | R      | 0.16 ± 0.04 | 1.35 ± 0.19  | 0.11 ± 0.01  | 7.96 ± 0.68  | 93.9 ± 10.4  | 99.3 ± 6.41    |
|    |                  |                                              |       |                       | L      | 0.05 ± 0.01 | 0.24 ± 0.01  | 0.07 ± 0.01  | 5.33 ± 0.20  | 17.0 ± 1.18  | 33.8 ± 1.17    |
|    |                  |                                              |       |                       | S      | 0.02 ± 0.01 | 0.17 ± 0.02  | 0.13 ± 0.01  | 3.45 ± 0.35  | 11.62 ± 0.54 | 23.7 ± 0.38    |
| 18 |                  | <i>Festuca sp</i>                            | S2    | 1                     | R      | 0.19 ± 0.01 | 1.23 ± 0.08  | 0.30 ± 0.01  | 7.87 ± 0.29  | 48.43 ± 3.48 | 191.3 ± 13.3   |
|    |                  |                                              |       |                       | L      | 0.03 ± 0.01 | 0.23 ± 0.01  | 0.31 ± 0.01  | 3.47 ± 0.07  | 5.18 ± 0.57  | 66.1 ± 1.20    |
| 19 | Polygonaceae     | <i>Muehlenbeckia tamnifolia</i> <sup>a</sup> | S2    | 1                     | L      | 0.05 ± 0.01 | 0.47 ± 0.01  | 1.05 ± 0.02  | 68.47 ± 1.86 | 17.10 ± 1.38 | 157.5 ± 3.38   |
|    |                  |                                              |       |                       | S      | 0.02 ± 0.01 | 0.26 ± 0.03  | 0.34 ± 0.02  | 21.33 ± 1.41 | 25.34 ± 3.31 | 65.6 ± 4.50    |
| 20 | Scrophulariaceae | <i>Buddleja interrupta</i> <sup>a</sup>      | S2    | 1                     | L      | 0.14 ± 0.03 | 0.24 ± 0.04  | 2.37 ± 0.24  | 11.92 ± 0.36 | 1.42 ± 0.20  | 142.0 ± 8.49   |
|    |                  |                                              |       |                       | S      | 0.05 ± 0.01 | 0.15 ± 0.01  | 4.37 ± 0.13  | 15.38 ± 0.17 | 13.7 ± 1.31  | 241.1 ± 10.8   |
| 21 | Solanaceae       | <i>Nicotiana thyrsoiflora</i>                | S1    | 1                     | L      | 2.97 ± 0.22 | 1.70 ± 0.03  | 21.62 ± 0.25 | 48.51 ± 0.57 | 41.8 ± 2.05  | 635.4 ± 128.9* |
|    |                  |                                              |       |                       | S      | 0.37 ± 0.03 | 0.29 ± 0.03  | 3.70 ± 0.29  | 6.30 ± 0.34  | 45.0 ± 5.29  | 245.0 ± 30.7*  |
|    |                  |                                              |       |                       | R      | 3.52 ± 0.05 | 1.52 ± 0.09  | 1.78 ± 0.09  | 7.47 ± 0.09  | 66.1 ± 9.11  | 71.5 ± 6.66    |

L: leaf, S: Stem, R: Root. \*Outlier, not taken into statistical processing. <sup>a</sup>Species collected without roots, not taken for the analysis of the results.

**Table S3.** Average concentrations of trace elements in organs for the same plant species found in the same sampling area (S1 or S2).

| Plant species                 | Sampling area | Nr of biological replicates | Organs | Ag    |        | As    |        | Cd    |        | Cu    |        | Pb    |         | Zn    |        |
|-------------------------------|---------------|-----------------------------|--------|-------|--------|-------|--------|-------|--------|-------|--------|-------|---------|-------|--------|
|                               |               |                             |        | mg/kg | ± SD   | mg/kg | ± SD   | mg/kg | ± SD   | mg/kg | ± SD   | mg/kg | ± SD    | mg/kg | ± SD   |
| <i>Ageratina fastigiata</i>   | 1             | 3                           | L      | 0,50  | ± 0,36 | 1,58  | ± 1,31 | 1,40  | ± 0,18 | 9,0   | ± 0,9  | 111,0 | ± 32,7  | 13,8  | ± 5,0  |
|                               |               |                             | S      | 1,85  | ± 0,34 | 1,85  | ± 1,69 | 1,70  | ± 0,36 | 7,1   | ± 2,1  | 71,6  | ± 14,1  | 30,7  | ± 24,5 |
|                               |               |                             | R      | 3,09  | ± 2,69 | 5,02  | ± 4,51 | 1,26  | ± 0,22 | 15,1  | ± 7,1  | 61,2  | ± 25,3  | 139,1 | ± 78,3 |
| <i>Cortaderia bifida</i>      | 1             | 5                           | L      | 0,49  | ± 0,29 | 0,07  | ± 0,13 | 0,13  | ± 0,17 | 4,1   | ± 0,9  | 25,5  | ± 0,8   | 23,1  | ± 24,3 |
|                               |               |                             | R      | 1,35  | ± 1,38 | 0,16  | ± 0,11 | 0,11  | ± 0,04 | 8,0   | ± 2,7  | 99,3  | ± 6,9   | 93,9  | ± 20,2 |
| <i>Achyrocline alata</i>      | 1             | 2                           | L      | 3,82  | ± 1,78 | 0,57  | ± 0,63 | 3,04  | ± 2,49 | 15,6  | ± 8,5  | 267,0 | ± 193,9 | 24,4  | ± 7,9  |
|                               |               |                             | S      | 1,34  | ± 0,53 | 0,15  | ± 0,06 | 3,58  | ± 1,86 | 12,5  | ± 4,0  | 298,4 | ± 47,2  | 38,2  | ± 6,7  |
|                               |               |                             | R      | 1,75  | ± 1,19 | 0,73  | ± 0,31 | 2,12  | ± 1,62 | 12,5  | ± 2,6  | 76,6  | ± 26,0  | 82,7  | ± 40,8 |
| <i>Hypericum laricifolium</i> | 1             | 4                           | L      | 2,01  | ± 0,47 | 0,2   | ± 0,05 | 1,88  | ± 2,61 | 9,7   | ± 2,0  | 101,8 | ± 86,4  | 15,8  | ± 5,8  |
|                               |               |                             | S      | 1,15  | ± 0,80 | 0,11  | ± 0,01 | 1,25  | ± 1,47 | 9,1   | ± 3,8  | 84,5  | ± 65,4  | 35,4  | ± 10,8 |
|                               |               |                             | R      | 4,40  | ± 2,61 | 1,79  | ± 0,33 | 1,16  | ± 1,41 | 21,5  | ± 10,5 | 133,6 | ± 138,5 | 132,8 | ± 11,4 |
| <i>Calamagrostis recta</i>    | 1             | 2                           | L      | 3,99  | ± 2,17 | 0,67  | ± 0,41 | 0,55  | ± 0,48 | 10,9  | ± 0,2  | 81,7  | ± 19,4  | 100,4 | ± 87,8 |

|                              |   |   |   |               |              |             |             |               |               |
|------------------------------|---|---|---|---------------|--------------|-------------|-------------|---------------|---------------|
|                              |   |   | R | 42,38 ± 45,75 | 13,3 ± 15,9  | 1,83 ± 1,89 | 54,7 ± 43,0 | 309,5 ± 38,5  | 826,5 ± 96,8  |
| <i>Brachyotum radula</i>     | 1 | 2 | L | 1,71 ± 0,11   | 1,11 ± 1,09  | 0,05 ± 0,00 | 6,8 ± 0,8   | 32,4 ± 20,9   | 8,7 ± 1,7     |
|                              |   |   | S | 1,44 ± 1,27   | 0,58 ± 0,59  | 0,12 ± 0,01 | 7,6 ± 1,7   | 28,9 ± 13,5   | 9,0 ± 1,0     |
|                              |   |   | R | 3,87 ± 3,77   | 1,74 ± 0,56  | 0,14 ± 0,01 | 11,4 ± 6,8  | 19,2 ± 8,7    | 53,6 ± 51,2   |
|                              |   |   |   |               |              |             |             |               |               |
| <i>Chusquea scandens</i>     | 1 | 2 | L | 4,76 ± 5,55   | 0,52 ± 0,64  | 0,39 ± 0,48 | 11,5 ± 8,6  | 152,6 ± 163,3 | 47,9 ± 44,4   |
|                              |   |   | S | 4,30 ± 5,35   | 0,43 ± 0,53  | 0,19 ± 0,18 | 9,7 ± 6,4   | 62,3 ± 42,0   | 36,1 ± 33,3   |
| <i>Bejaria sp.</i>           | 2 | 2 | L | 0,62 ± 0,25   | 0,07 ± 0,06  | 0,06 ± 0,08 | 4,4 ± 1,4   | 17,6 ± 1,3    | 2,7 ± 0,3     |
|                              |   |   | S | 0,42 ± 0,19   | 0,03 ± 0,03  | 0,35 ± 0,23 | 3,5 ± 1,5   | 40,4 ± 10,7   | 9,4 ± 8,8     |
| <i>Cortaderia bifida</i>     | 2 | 5 | L | 2,45 ± 1,82   | 0,50 ± 0,43  | 0,46 ± 0,49 | 8,6 ± 3,0   | 73,8 ± 53,0   | 39,04 ± 39,0  |
|                              |   |   | R | 11,07 ± 1,44  | 3,47 ± 0,64  | 0,73 ± 0,23 | 20,2 ± 2,9  | 113,0 ± 30,6  | 211,68 ± 39,4 |
| <i>Pernettya prostrata</i>   | 2 | 2 | L | 0,85 ± 0,82   | 0,03 ± 0,003 | 0,42 ± 0,03 | 5,1 ± 2,3   | 29,6 ± 2,7    | 3,34 ± 1,25   |
|                              |   |   | S | 0,55 ± 0,29   | 0,04 ± 0,001 | 1,18 ± 0,08 | 7,5 ± 2,2   | 117,6 ± 32,0  | 11,2 ± 2,73   |
|                              |   |   | R | 2,33 ± 1,21   | 0,36 ± 0,03  | 0,78 ± 0,27 | 15,2 ± 3,1  | 157,3 ± 40,1  | 55,4 ± 14,5   |
| <i>Calceolaria tetragona</i> | 2 | 2 | L | 0,52 ± 0,47   | 0,11 ± 0,1   | 1,04 ± 0,35 | 7,2 ± 1,8   | 53,1 ± 12,4   | 7,36 ± 8,2    |
|                              |   |   | S | 0,32 ± 0,25   | 0,10 ± 0,001 | 6,63 ± 2,14 | 18,4 ± 2,5  | 236,0 ± 30,8  | 104,0 ± 64,6  |
|                              |   |   | R | 0,72 ± 0,09   | 0,13 ± 0,03  | 3,44 ± 1,88 | 12,7 ± 3,0  | 220,6 ± 124,7 | 95,6 ± 58,2   |
| <i>Brachyotum radula</i>     | 2 | 2 | L | 0,54 ± 0,02   | 0,08 ± 0,05  | 1,11 ± 0,10 | 7,4 ± 0,2   | 85,3 ± 45,6   | 9,33 ± 2,8    |
|                              |   |   | S | 1,32 ± 1,42   | 0,23 ± 0,18  | 3,71 ± 4,14 | 16,8 ± 2,3  | 196,7 ± 55,6  | 79,7 ± 34,3   |
|                              |   |   | R | 0,72 ± 0,14   | 0,13 ± 0,02  | 3,44 ± 1,70 | 12,7 ± 3,8  | 220,6 ± 118,5 | 95,6 ± 62,4   |

L: leaf, S: Stem, R: Root.
